# Supplementary material for: Deep muscle-proteomic analysis of freeze-dried human muscle biopsies reveals fiber type-specific adaptations to exercise training
Source: PubMed Central journal article supplement (PMC7803955; doi:10.1038/s41467-020-20556-8), 2021-01-12
Supplement: 41467_2020_20556_MOESM1_ESM.pdf [file 41467_2020_20556_MOESM1_ESM.pdf]

## Deep muscle-proteomic analysis of freeze-dried human muscle biopsies reveals fiber type-specific adaptations to exercise training

Deshmukh AS<sup>1,2§\*</sup>, Steenberg DE<sup>3§</sup>, Hostrup M<sup>4</sup>, Birk JB<sup>3</sup>, Larsen JK<sup>2</sup>, Santos A<sup>1</sup>, Kjøbsted R<sup>3</sup>, Hingst JR<sup>3</sup>, Schéele CC<sup>2,5</sup>, Murgia M<sup>6,7</sup>, Kiens B<sup>3</sup>, Richter EA<sup>3</sup>, Mann M<sup>1,6</sup> and Wojtaszewski JFP<sup>3\*</sup>

### Supplemental Material

**Supplemental Table S1** Subject characteristics describing clinical parameters.

| Subjects | Age | Sex | Weight | Fasting glucose | Fasting insulin (uIU/ml) | HR rest | HR max | Total Body Fat (Kg) | % Fat | Total lean mass (Kg) |
|----------|-----|-----|--------|-----------------|--------------------------|---------|--------|---------------------|-------|----------------------|
| <b>A</b> | 21  | M   | 78.7   | 4.7             | 3.5                      | 67      | 191    | 12.9                | 16.3  | 63.1                 |
| <b>B</b> | 22  | M   | 81.6   | 5.3             | 4.3                      | 54      | 196    | 21.2                | 25.8  | 57.5                 |
| <b>C</b> | 25  | M   | 74.8   | 5.2             | 7.1                      | 59      | 201    | 21.8                | 29.3  | 49.9                 |
| <b>D</b> | 26  | M   | 86.7   | 5.0             | 4.0                      | 57      | 200    | 16.3                | 18.7  | 67.5                 |
| <b>E</b> | 27  | M   | 83.1   | 5.4             | 6.0                      | 65      | 195    | 20.7                | 24.9  | 59.2                 |

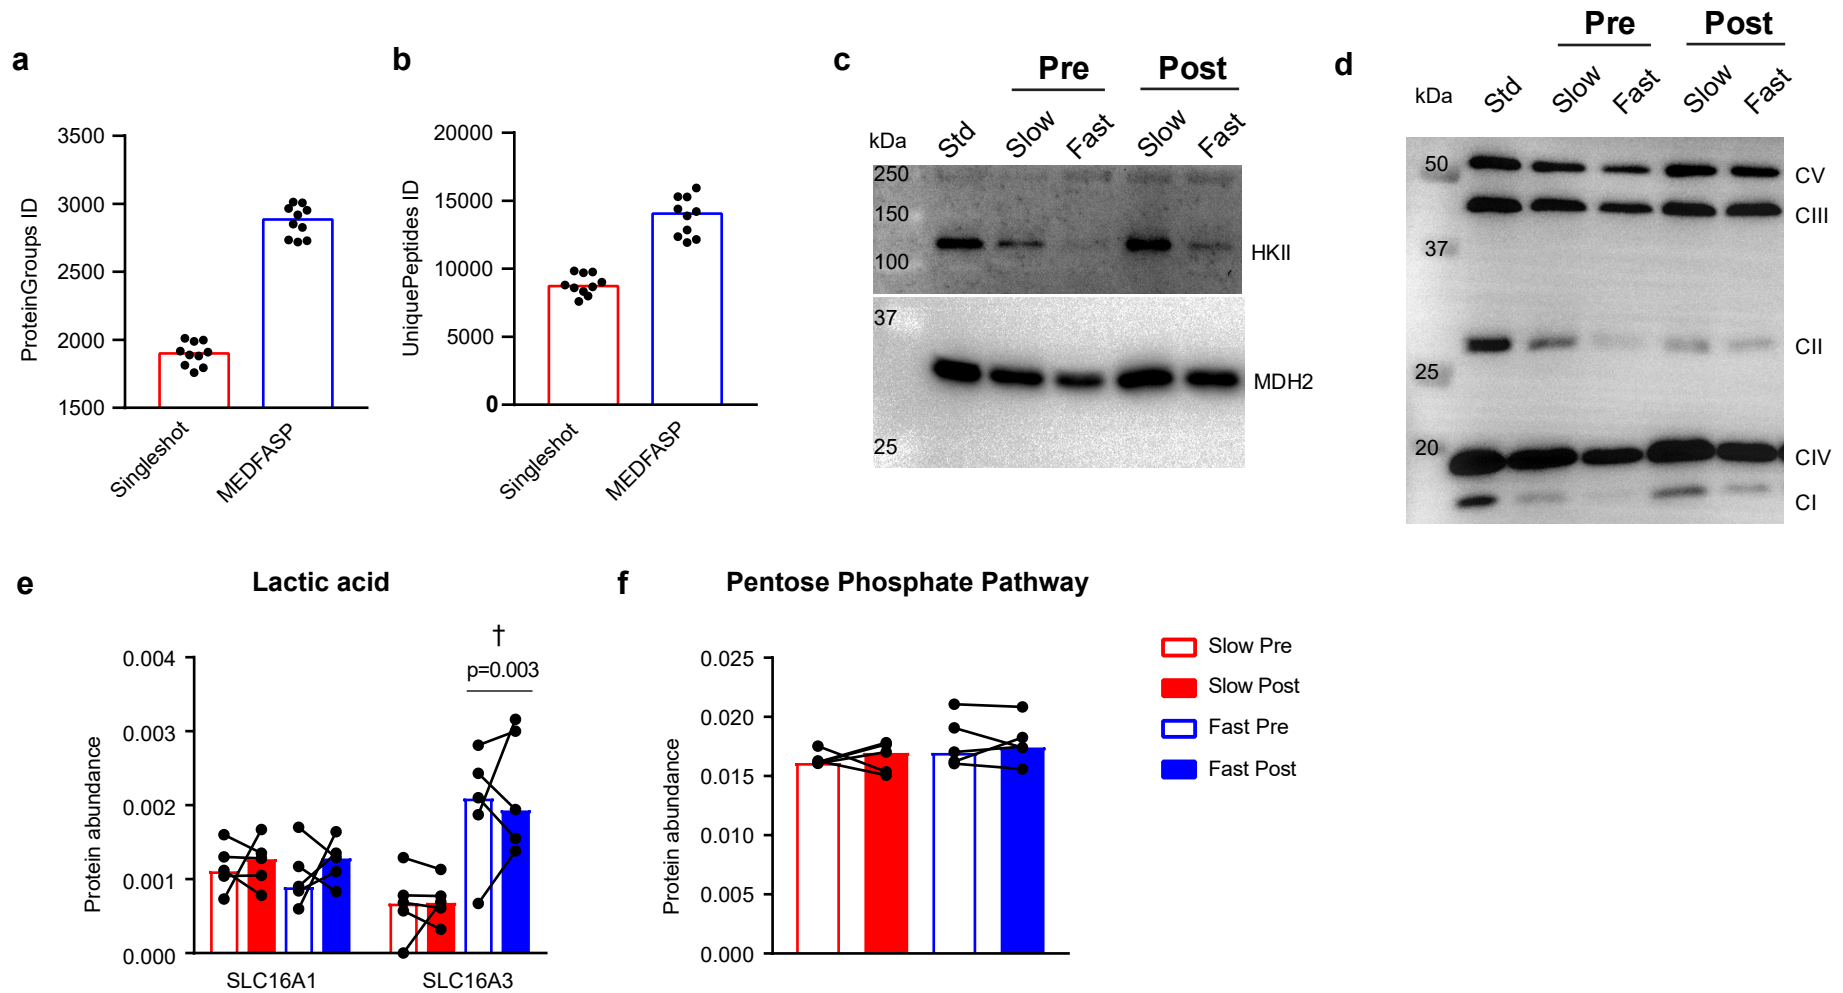

**Supplementary Fig. 1 Sample preparation comparison, representative western blots and protein abundance for lactic acid metabolism and pentose phosphate pathway.** Comparison of protein and unique peptide identification using single shot and MEDFASP (multi-enzyme digestion filter-aided sample preparation) protocol analyzed from total muscle lysate ( $n=10$  (5 PRE + 5 POST)) (a-b). Representative Western blots for HKII, MDH2 (c) and OXPHOS subunits CI-CV (d) in slow and fast muscle fibers under PRE and Post conditions (c-d-). Normalized protein abundance of enzymes involved in lactic acid metabolism ( $n=5$ , e) and pentose phosphate pathways ( $n=5$ , f). Data in figures are shown as median. P-values by two-way RM ANOVA are indicated in figure S1E. “\*” denotes a training effect. Lines indicate main effects.

Group: Slow pre vs Fast pre    ■ Quantified values    ■ Missing values (imputed)

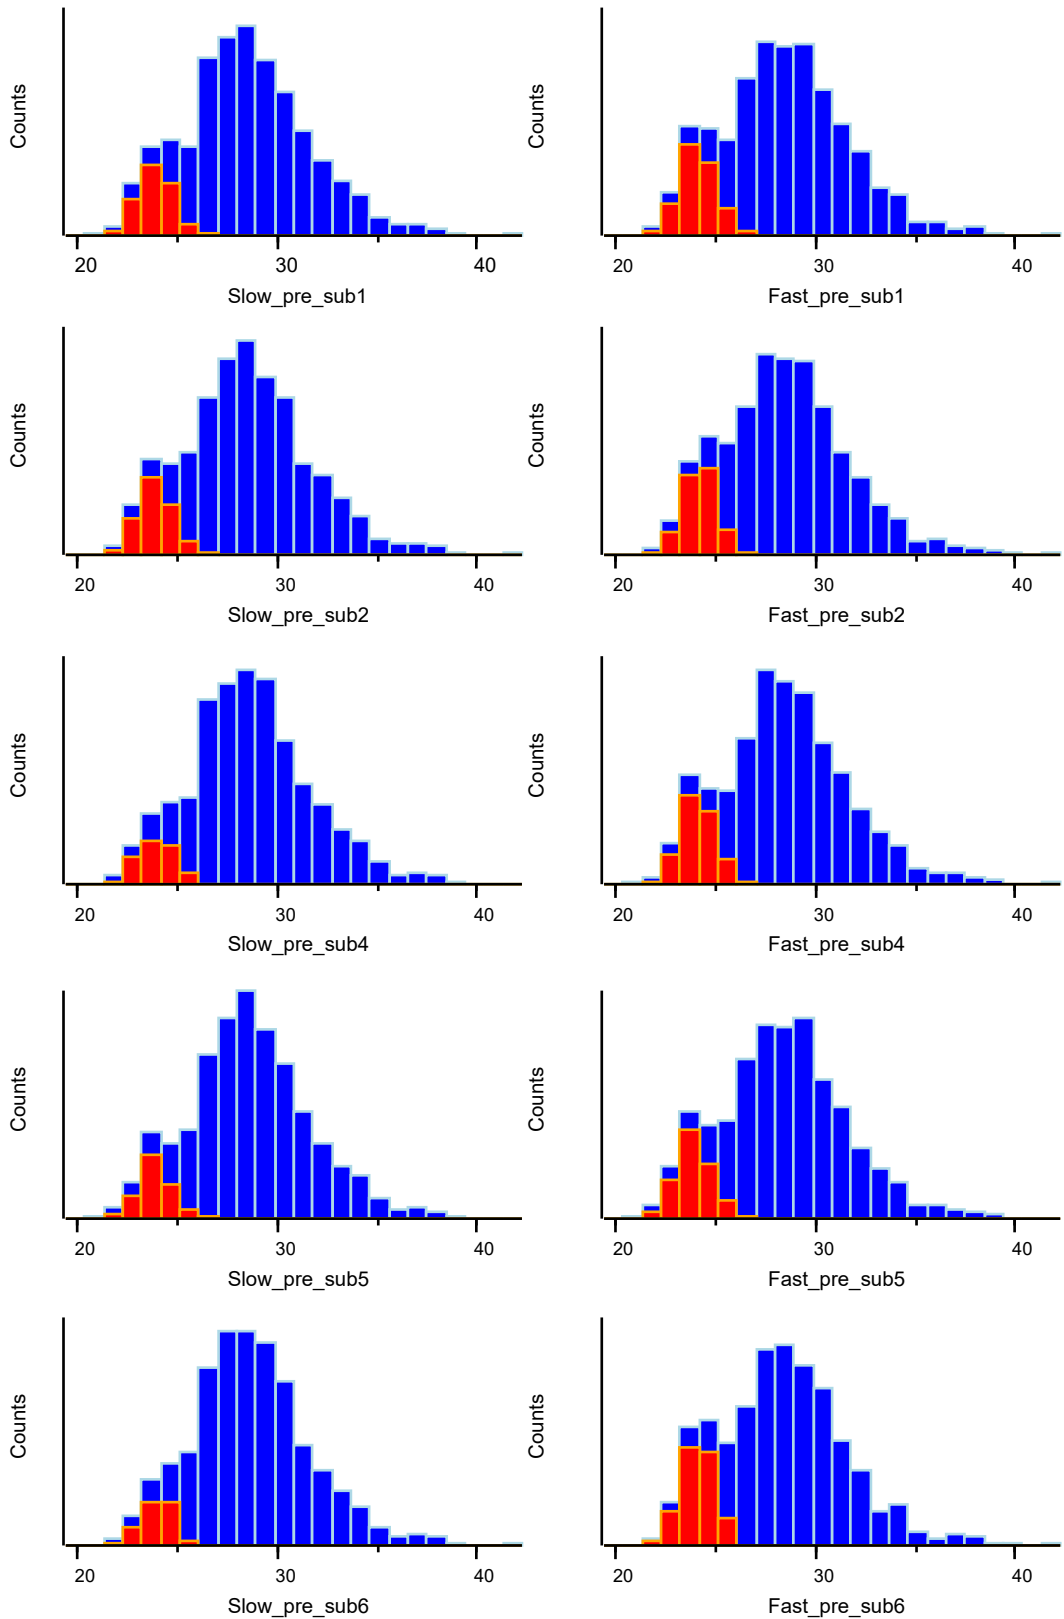

**Supplementary Fig. 2 Distribution of imputed and non imputed data for slow and fast fibers under PRE condition.** Histogram representing quantified (in blue) and imputed (in orange) values in slow PRE and fast PRE groups (n=5). Each histogram corresponds to one subject, one fiber type (Slow/Fast) and one biological condition (PRE).

Group: Fast pre vs Fast post    Quantified values    Missing values (imputed)

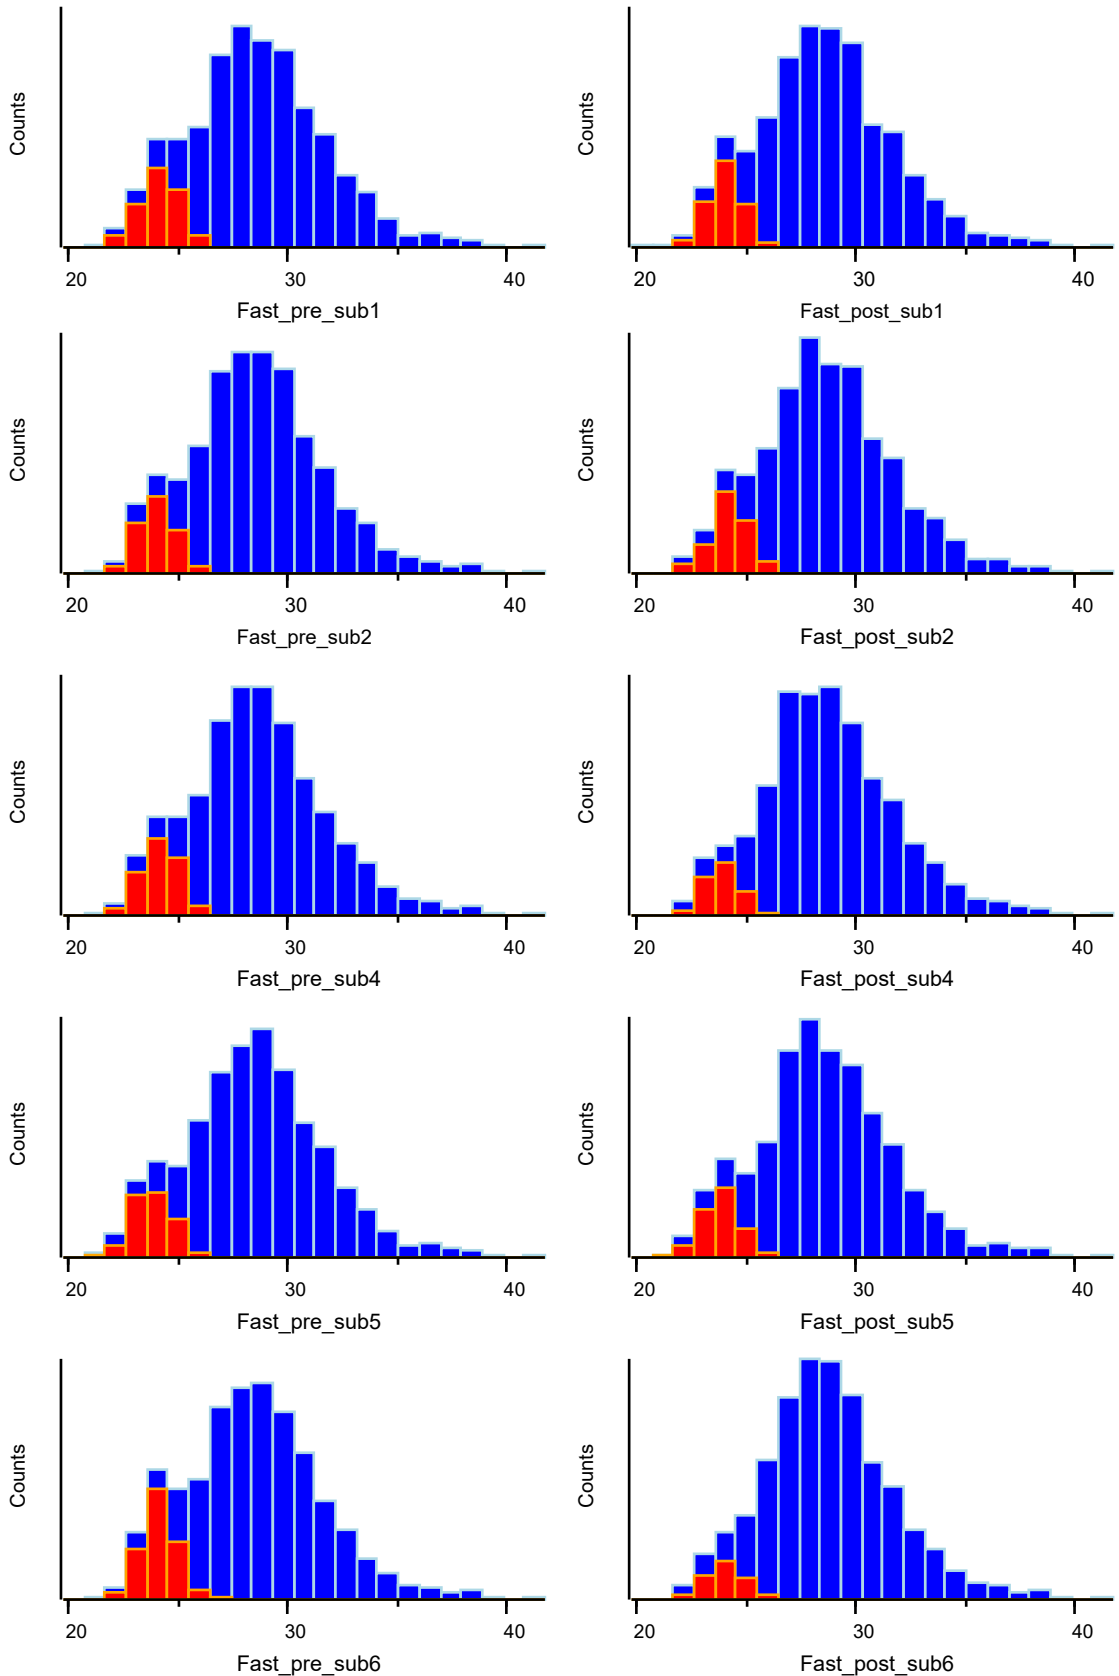

**Supplementary Fig. 3 Distribution of imputed and non imputed data for fast fibers under PRE and POST condition.** Histogram representing quantified (in blue) and imputed (in orange) values in fast PRE and fast POST group (n=5). Each histogram corresponds to one subject, fast fiber type (Slow/Fast) and one biological condition (PRE/POST).

Group: whole muscle pre vs post    ■ Quantified values    ■ Missing values (imputed)

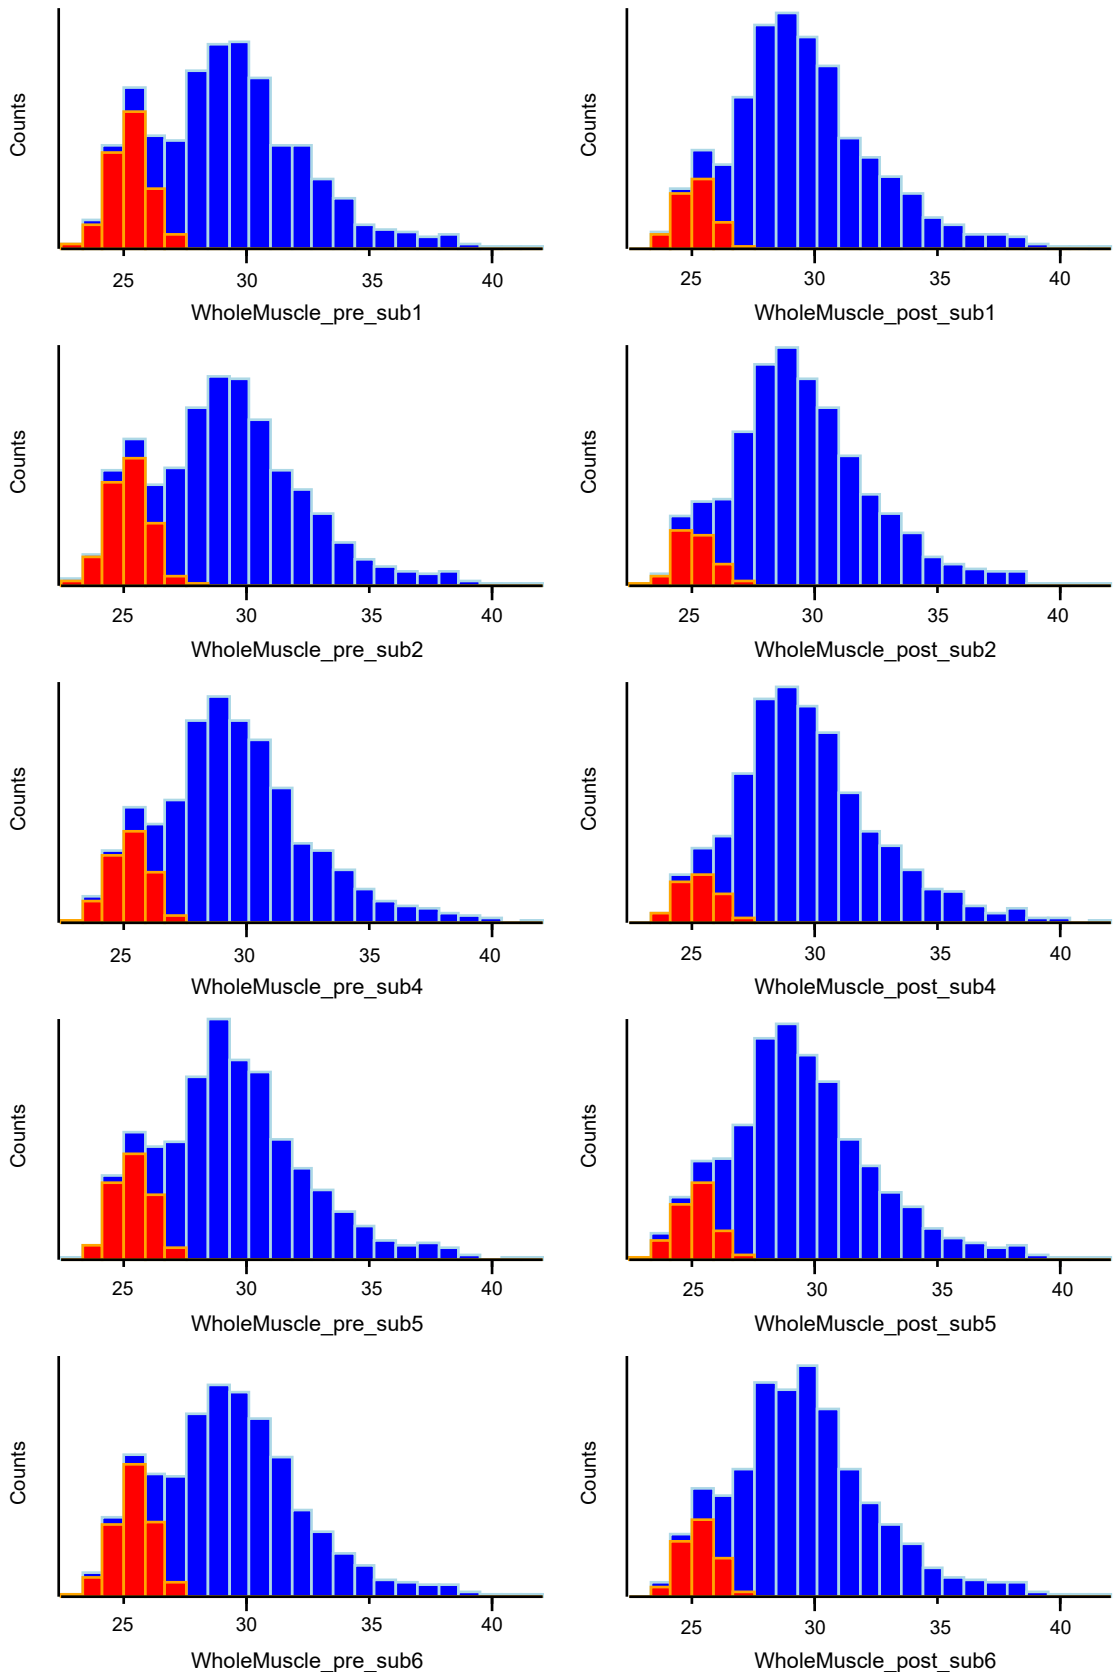

**Supplementary Fig. 4 Distribution of imputed and non imputed data for whole muscle under PRE and POST condition.** Histogram representing quantified (in blue) and imputed (in orange) values in whole muscle PRE and POST group (n=5). Each histogram corresponds to one subject, and one biological condition (PRE/POST).
