# Supplementary material for: Deep muscle-proteomic analysis of freeze-dried human muscle biopsies reveals fiber type-specific adaptations to exercise training
Source: PubMed Central journal article supplement (PMC7803955; doi:10.1038/s41467-020-20556-8), 2021-01-12
Supplement: 41467_2020_20556_MOESM3_ESM.pdf [file 41467_2020_20556_MOESM3_ESM.pdf]

**Title:** Supplemental Data 1

**Description:** The list of total proteins identified in muscle fibers and human primary muscle cells.

**Title:** Supplemental Data 2

**Description:** Comparison of protein identification by singleshoot and MEDFASP protocol in whole muscle lysate

**Title:** Supplemental Data 3

**Description:** Cumulative protein abundance of all proteins in slow and fast muscle fibers.

**Title:** Supplemental Data 4

**Description:** Pearson correlation ( $r$ ) between the replicates

**Title:** Supplemental Data 5

**Description:** The list of significantly different proteins between slow and fast muscle fibers (paired t test) + Enriched categories after Fischer Exact Test + non-imputed LFQ values for quantified proteins

**Title:** Supplemental Data 6

**Description:** Members of individual organelle/compartement presented in figure 2

**Title:** Supplemental Data 7

**Description:** The list of significantly different proteins in slow fibers, fast fibers and whole muscle lysate after exercise (paired t test) + non imputed matrices displaying protein quantification for slow fiber, fast fiber and whole muscle lysate.

**Title:** Supplemental Data 8

**Description:** Output file of ClueGo enrichment analysis

**Title:** Supplemental Data 9

**Description:** The list of the proteins adapted to exercise training in fiber type specific manner + list of the proteins which were exclusively quantified in either slow or fast muscle fiber + log<sub>2</sub> fold change for significantly different proteins

**Title:** Supplemental Data 10

**Description:** Members of individual protein categories presented in figure 5

**Title:** Supplemental Data 11

**Description:** Fold change, significance score for enzymes from glycolysis, PHD complex and TCA cycle in slow and fast muscle fibers.
